# Supplementary material for: Discovery of rare mutations in extensively pooled DNA samples using multiple target enrichment
Source: PubMed Central journal article supplement — Plant Biotechnol J. 2014 Mar 7;12(6):709–17. doi: 10.1111/pbi.12174 (PMC4265296; doi:10.1111/pbi.12174), 2014-03-07
Supplement: pbi0012-0709-SD1.pdf [file pbi0012-0709-SD1.pdf]

**Supplementary Table 1. Adaptors and primers used in the pilot experiment**

| Primers and adaptors | Sequence(5'-3')                                           |
|----------------------|-----------------------------------------------------------|
| Ad1                  | CGAGATCGTGATGTGACTGGAGTTCAGACGTGTGCTCTTCCGATCTCTT         |
| Ad2                  | 5'-Phosphate-AGAGATCG-amino-3'                            |
| Ad3                  | CGAGATCGTGATGTGACTGGAGTTCAGACGTGTGCTCTTCCGATCTAGAT        |
| Ad4                  | 5'-Phosphate-TCTAGATCG-amino-3'                           |
| Ad5                  | CGAGATCGTGATGTGACTGGAGTTCAGACGTGTGCTCTTCCGATCTTGTT        |
| Ad6                  | 5'-Phosphate-ACAAGATCG-amino-3'                           |
| Ad7                  | CGAGATCGTGATGTGACTGGAGTTCAGACGTGTGCTCTTCCGATCTGGCT        |
| Ad8                  | 5'-Phosphate-GCCAGATCG-amino-3'                           |
| Ad9                  | CGAGATCGTGATGTGACTGGAGTTCAGACGTGTGCTCTTCCGATCTCGAT        |
| Ad10                 | 5'-Phosphate-TCGAGATCG-amino-3'                           |
| TSP1-1               | GCGTGCCTCCTTCCAGTCAATCTTT                                 |
| TSP1-2               | TATGGACAATCCTTCTGGTGACTTC                                 |
| TSP1-3               | TGTTTTGCTGTAGGAAATGATCGGA                                 |
| TSP1-4               | GAATGTGGTGTGGACTTCGCTCTAC                                 |
| TSP1-5               | GCTAAGGCACAGTTCGATCCAGCAT                                 |
| TSP1-6               | GGCGTTTCCCTGATAATCCGGTGA                                  |
| TSP1-7               | AGCCAGGATGAGGTCTCGCAATTCA                                 |
| TSP1-8               | ACGCGCCAGAGTTGGAGATAGCTAT                                 |
| TSP1-9               | GGGATCGCATAAACTGGGGCATCTT                                 |
| TSP1-10              | TCTACCGGCTGTGATCCATGACCTA                                 |
| TSP1-11              | AAGATGTCTGGACGTGTTGAGGACG                                 |
| TSP1-12              | AGCCAGCAGGAGGTCTACAAGTTCA                                 |
| TSP1-13              | TGGCAAAGAGTTTCGACATCCCGAAG                                |
| AP1                  | CATACGAGATCGTGATGTGACTGGAG                                |
| TSP2-1               | TACACGACGCTCTTCCGATCTGAATATGTAGCTCTTCCCTT                 |
| TSP2-2               | TACACGACGCTCTTCCGATCTGCAGAAAGTACCGTCACATA                 |
| TSP2-3               | TACACGACGCTCTTCCGATCTTGGCCCCTTGTGTTATATGG                 |
| TSP2-4               | TACACGACGCTCTTCCGATCTTGAGGGAGAGAGCTTTGGATAG               |
| TSP2-5               | TACACGACGCTCTTCCGATCTGAAAAGAAGTAAGCCAAAGTCAGTT            |
| TSP2-6               | TACACGACGCTCTTCCGATCTGATGACGGTGCCCATGTTT                  |
| TSP2-7               | TACACGACGCTCTTCCGATCTGTCGCTTTTGATGTGGATTA                 |
| TSP2-8               | TACACGACGCTCTTCCGATCTAAAGAAGTTGGCTACGACATC                |
| TSP2-9               | TACACGACGCTCTTCCGATCTTGACCACACTGACTCACTGC                 |
| TSP2-10              | TACACGACGCTCTTCCGATCTGATCCATGACCTACACTCGAG                |
| TSP2-11              | TACACGACGCTCTTCCGATCTGGACCTGATAGACTCGACGTAC               |
| TSP2-12              | TACACGACGCTCTTCCGATCTAGGAGCAGTTCAGGTTCTTCAC               |
| TSP2-13              | TACACGACGCTCTTCCGATCTACAGGCTCCCTCACATCTTCA                |
| AP2                  | GATGTGACTGGAGTTCAGACGTGT                                  |
| AP3F                 | CAAGCAGAAGACGGCATAACGAGATCGTGATGTGACTGGAGTTCAGACGT        |
| AP3R                 | AATGATACGGCGACCACCGAGATCTACACTCTTCCCTACACGACGCTCTTCCGATCT |

Ad: adaptor. TSP: target specific primer. AP: adaptor-derived primer. In the first round PCR, the forward primers of subpool1 consisted of TSP1-1 (target specific primer), TSP1-2 and TSP1-3; for subpool2, TSP1-1, TSP1-2, ... TSP1-5 were mixed as primers;

---

for subpool3, TSP1-1, TSP1-2, ... TSP1-7 were mixed as the primers; for subpool4, TSP1-1, TSP1-2, ... TSP1-10 were mixed as the primers; for subpool5, TSP1-1, TSP1-2, ... TSP1-13 were mixed as the primers.

**Supplementary Table 2. Adaptors and primers used in mutation discovery from the sodium azide induced rice population**

| Primers and adaptors | Sequence(5'-3')                                      |
|----------------------|------------------------------------------------------|
| Ad25                 | CGAGATCGTGATGTGACTGGAGTTCAGACGTGTGCTCTTCCGATCTCATGAT |
| Ad26                 | 5'-Phosphate-TCATGAGATCG-amino-3'                    |
| Ad27                 | CGAGATCGTGATGTGACTGGAGTTCAGACGTGTGCTCTTCCGATCTCATCTT |
| Ad28                 | 5'-Phosphate-AGATGAGATCG-amino-3'                    |
| Ad29                 | CGAGATCGTGATGTGACTGGAGTTCAGACGTGTGCTCTTCCGATCTCATACT |
| Ad30                 | 5'-Phosphate-GTATGAGATCG-amino-3'                    |
| Ad31                 | CGAGATCGTGATGTGACTGGAGTTCAGACGTGTGCTCTTCCGATCTCAGAGT |
| Ad32                 | 5'-Phosphate-CTCTGAGATCG-amino-3'                    |
| Ad33                 | CGAGATCGTGATGTGACTGGAGTTCAGACGTGTGCTCTTCCGATCTCAGTCT |
| Ad34                 | 5'-Phosphate-GACTGAGATCG-amino-3'                    |
| Ad35                 | CGAGATCGTGATGTGACTGGAGTTCAGACGTGTGCTCTTCCGATCTCAGCTT |
| Ad36                 | 5'-Phosphate-AGCTGAGATCG-amino-3'                    |
| Ad37                 | CGAGATCGTGATGTGACTGGAGTTCAGACGTGTGCTCTTCCGATCTCACTAT |
| Ad38                 | 5'-Phosphate-TAGTGAGATCG-amino-3'                    |
| Ad39                 | CGAGATCGTGATGTGACTGGAGTTCAGACGTGTGCTCTTCCGATCTCACGTT |
| Ad40                 | 5'-Phosphate-ACGTGAGATCG-amino-3'                    |
| Ad41                 | CGAGATCGTGATGTGACTGGAGTTCAGACGTGTGCTCTTCCGATCTCACTGT |
| Ad42                 | 5'-Phosphate-CAGTGAGATCG-amino-3'                    |
| Ad43                 | CGAGATCGTGATGTGACTGGAGTTCAGACGTGTGCTCTTCCGATCTCAAGGT |
| Ad44                 | 5'-Phosphate-CCTTGAGATCG-amino-3'                    |
| Ad45                 | CGAGATCGTGATGTGACTGGAGTTCAGACGTGTGCTCTTCCGATCTCAACCT |
| Ad46                 | 5'-Phosphate-GGTTGAGATCG-amino-3'                    |
| Ad47                 | CGAGATCGTGATGTGACTGGAGTTCAGACGTGTGCTCTTCCGATCTCAAGTT |
| Ad48                 | 5'-Phosphate-ACTTGAGATCG-amino-3'                    |
| Ad49                 | CGAGATCGTGATGTGACTGGAGTTCAGACGTGTGCTCTTCCGATCTAGTGAT |
| Ad50                 | 5'-Phosphate-TACTAGATCG-amino-3'                     |
| Ad51                 | CGAGATCGTGATGTGACTGGAGTTCAGACGTGTGCTCTTCCGATCTAGTCTT |
| Ad52                 | 5'-Phosphate-AGACTAGATCG-amino-3'                    |
| Ad53                 | CGAGATCGTGATGTGACTGGAGTTCAGACGTGTGCTCTTCCGATCTAGTACT |
| Ad54                 | 5'-Phosphate-GTACTAGATCG-amino-3'                    |
| Ad55                 | CGAGATCGTGATGTGACTGGAGTTCAGACGTGTGCTCTTCCGATCTAGGATT |
| Ad56                 | 5'-Phosphate-ATCCTAGATCG-amino-3'                    |
| Ad57                 | CGAGATCGTGATGTGACTGGAGTTCAGACGTGTGCTCTTCCGATCTAGGTGT |
| Ad58                 | 5'-Phosphate-CACCTAGATCG-amino-3'                    |
| Ad59                 | CGAGATCGTGATGTGACTGGAGTTCAGACGTGTGCTCTTCCGATCTAGGCTT |
| Ad60                 | 5'-Phosphate-AGCCTAGATCG-amino-3'                    |
| Ad61                 | CGAGATCGTGATGTGACTGGAGTTCAGACGTGTGCTCTTCCGATCTAGCATT |
| Ad62                 | 5'-Phosphate-ATGCTAGATCG-amino-3'                    |
| Ad63                 | CGAGATCGTGATGTGACTGGAGTTCAGACGTGTGCTCTTCCGATCTAGCTAT |
| Ad64                 | 5'-Phosphate-TAGCTAGATCG-amino-3'                    |
| Ad65                 | CGAGATCGTGATGTGACTGGAGTTCAGACGTGTGCTCTTCCGATCTAGCGTT |

(To be continued)

**Supplementary Table 2. Adaptors and primers used in mutation discovery from the sodium azide induced rice population (continued)**

| Primers and adaptors | Sequence(5'-3')                                      |
|----------------------|------------------------------------------------------|
| Ad66                 | 5'-Phosphate-ACGCTAGATCG-amino-3'                    |
| Ad67                 | CGAGATCGTGATGTGACTGGAGTTCAGACGTGTGCTCTTCCGATCTAGAGCT |
| Ad68                 | 5'-Phosphate-GCTCTAGATCG-amino-3'                    |
| Ad69                 | CGAGATCGTGATGTGACTGGAGTTCAGACGTGTGCTCTTCCGATCTAGACAT |
| Ad70                 | 5'-Phosphate-TGTCTAGATCG-amino-3'                    |
| Ad71                 | CGAGATCGTGATGTGACTGGAGTTCAGACGTGTGCTCTTCCGATCTAGAGTT |
| Ad72                 | 5'-Phosphate-ACTCTAGATCG-amino-3'                    |
| Ad73                 | CGAGATCGTGATGTGACTGGAGTTCAGACGTGTGCTCTTCCGATCTTCTGCT |
| Ad74                 | 5'-Phosphate-GCAGAAGATCG-amino-3'                    |
| Ad75                 | CGAGATCGTGATGTGACTGGAGTTCAGACGTGTGCTCTTCCGATCTTCTCAT |
| Ad76                 | 5'-Phosphate-TGAGAAGATCG-amino-3'                    |
| Ad77                 | CGAGATCGTGATGTGACTGGAGTTCAGACGTGTGCTCTTCCGATCTTCTAGT |
| Ad78                 | 5'-Phosphate-CTAGAAGATCG-amino-3'                    |
| Ad79                 | CGAGATCGTGATGTGACTGGAGTTCAGACGTGTGCTCTTCCGATCTTCGAGT |
| Ad80                 | 5'-Phosphate-CTCGAAGATCG-amino-3'                    |
| Ad81                 | CGAGATCGTGATGTGACTGGAGTTCAGACGTGTGCTCTTCCGATCTTCGTCT |
| Ad82                 | 5'-Phosphate-GACGAAGATCG-amino-3'                    |
| Ad83                 | CGAGATCGTGATGTGACTGGAGTTCAGACGTGTGCTCTTCCGATCTTCGCTT |
| Ad84                 | 5'-Phosphate-AGCGAAGATCG-amino-3'                    |
| Ad85                 | CGAGATCGTGATGTGACTGGAGTTCAGACGTGTGCTCTTCCGATCTTCCTAT |
| Ad86                 | 5'-Phosphate-TAGGAAGATCG-amino-3'                    |
| Ad87                 | CGAGATCGTGATGTGACTGGAGTTCAGACGTGTGCTCTTCCGATCTTCCGTT |
| Ad88                 | 5'-Phosphate-ACGGAAGATCG-amino-3'                    |
| Ad89                 | CGAGATCGTGATGTGACTGGAGTTCAGACGTGTGCTCTTCCGATCTTCCTGT |
| Ad90                 | 5'-Phosphate-CAGGAAGATCG-amino-3'                    |
| Ad91                 | CGAGATCGTGATGTGACTGGAGTTCAGACGTGTGCTCTTCCGATCTTCAGGT |
| Ad92                 | 5'-Phosphate-CCTGAAGATCG-amino-3'                    |
| Ad93                 | CGAGATCGTGATGTGACTGGAGTTCAGACGTGTGCTCTTCCGATCTTCACTT |
| Ad94                 | 5'-Phosphate-AGTGAAGATCG-amino-3'                    |
| Ad95                 | CGAGATCGTGATGTGACTGGAGTTCAGACGTGTGCTCTTCCGATCTTCAGCT |
| Ad96                 | 5'-Phosphate-GCTGAAGATCG-amino-3'                    |
| Ad97                 | CGAGATCGTGATGTGACTGGAGTTCAGACGTGTGCTCTTCCGATCTGTTGAT |
| Ad98                 | 5'-Phosphate-TCAACAGATCG-amino-3'                    |
| Ad99                 | CGAGATCGTGATGTGACTGGAGTTCAGACGTGTGCTCTTCCGATCTGTTCTT |
| Ad100                | 5'-Phosphate-AGAACAGATCG-amino-3'                    |
| Ad101                | CGAGATCGTGATGTGACTGGAGTTCAGACGTGTGCTCTTCCGATCTGTTACT |
| Ad102                | 5'-Phosphate-GTAACAGATCG-amino-3'                    |
| Ad103                | CGAGATCGTGATGTGACTGGAGTTCAGACGTGTGCTCTTCCGATCTGTGAGT |
| Ad104                | 5'-Phosphate-CTCACAGATCG-amino-3'                    |
| Ad105                | CGAGATCGTGATGTGACTGGAGTTCAGACGTGTGCTCTTCCGATCTGTGTCT |
| Ad106                | 5'-Phosphate-GACACAGATCG-amino-3'                    |

(To be continued)

**Supplementary Table 2. Adaptors and primers used in mutation discovery from the sodium azide induced rice population (*continued*)**

| Primers and adaptors | Sequence(5'-3')                                      |
|----------------------|------------------------------------------------------|
| Ad107                | CGAGATCGTGATGTGACTGGAGTTCAGACGTGTGCTCTTCCGATCTGTGCTT |
| Ad108                | 5'-Phosphate-AGCACAGATCG-amino-3'                    |
| Ad109                | CGAGATCGTGATGTGACTGGAGTTCAGACGTGTGCTCTTCCGATCTGTCTAT |
| Ad110                | 5'-Phosphate-TAGACAGATCG-amino-3'                    |
| Ad111                | CGAGATCGTGATGTGACTGGAGTTCAGACGTGTGCTCTTCCGATCTGTGCTT |
| Ad112                | 5'-Phosphate-ACGACAGATCG-amino-3'                    |
| Ad113                | CGAGATCGTGATGTGACTGGAGTTCAGACGTGTGCTCTTCCGATCTGTCTGT |
| Ad114                | 5'-Phosphate-CAGACAGATCG-amino-3'                    |
| Ad115                | CGAGATCGTGATGTGACTGGAGTTCAGACGTGTGCTCTTCCGATCTGTAGTT |
| Ad116                | 5'-Phosphate-ACTACAGATCG-amino-3'                    |
| Ad117                | CGAGATCGTGATGTGACTGGAGTTCAGACGTGTGCTCTTCCGATCTGTACAT |
| Ad118                | 5'-Phosphate-TGTACAGATCG-amino-3'                    |
| Ad119                | CGAGATCGTGATGTGACTGGAGTTCAGACGTGTGCTCTTCCGATCTGTAGCT |
| Ad120                | 5'-Phosphate-GCTACAGATCG-amino-3'                    |
| TSP1-14              | AATTGGTCGAGCAGACGACGACGAA                            |
| TSP1-15              | CTCTAAGTGGGGAGAAAGTGGAACG                            |
| TSP1-16              | CTACAGGTGCATCAAGGAGGCGCTC                            |
| TSP1-17              | ACAGTCCGGCACTGTGAACATGAAG                            |
| TSP1-18              | CACAGCTAACTCGACGCTCAATTCC                            |
| TSP1-19              | TCAAGATGGGGAGATCAGGGTACGG                            |
| TSP1-20              | TGTAAGCATCTGGACCGGTGTCCAC                            |
| TSP1-21              | GTCTTCATCATTACACTAGCTGCGA                            |
| TSP1-22              | TGGATCACGTGCTGATGCTGATCGC                            |
| TSP1-23              | CACTTGTGTTAGCTAGGCTTGACCG                            |
| TSP1-24              | GGCCACTGCAATTTGTAGGGCTACT                            |
| TSP1-25              | GGATCGCATAAACTGGGGCATCTTG                            |
| TSP1-26              | TCCTCTGATCTTACCTGCAAAACGC                            |
| TSP1-27              | ACATACGGCACCCAGTCATTACAAG                            |
| TSP1-28              | CGTCAGAAAACACGGCATCATCAAT                            |
| TSP1-29              | TTGCTAATGGTCCTCTCGTAGTCCC                            |
| TSP1-30              | ACAGGATTACTTTGCGAAATGGGGG                            |
| TSP1-31              | GAATCACGGATGATCGCTACGGTTC                            |
| TSP1-32              | GGCTGGTTGTTGTCATGGATCTTGT                            |
| TSP1-33              | TGGGGAGAAAATGGCATAGTTGATA                            |
| TSP1-34              | TGGATCATTCTATGGTTTTTTGCCG                            |
| TSP1-35              | CGTACGTGTTGGTATGGACATGGCC                            |
| TSP1-36              | CGCAGGAATATTTTCGCGAAATGGGG                           |
| TSP1-37              | GACATCGTACCCTAGCAAGTGCAAG                            |
| TSP1-38              | GTTTTGGCCCAATAAGGTCCGAGTT                            |
| TSP1-39              | TCCATGCATGTTACGGGAACGCTCG                            |
| TSP1-40              | CCCTGGTATAAGAGCCTGCAATATG                            |

(To be continued)

**Supplementary Table 2. Adaptors and primers used in mutation discovery from the sodium azide induced rice population (*continued*)**

| Primers and adaptors | Sequence(5'-3')                            |
|----------------------|--------------------------------------------|
| TSP1-41              | GAGCCGGTGACATAGTATCAGAACG                  |
| TSP1-42              | TTGGGACGAAGTAGTAGGTGGCACG                  |
| TSP1-43              | TCTCCACAGATATTTGCCTTACATG                  |
| TSP1-44              | TCTCCACACTGGACACCTTGAGCTC                  |
| TSP1-45              | TCCCTTGATAGATCAGCCATCGTCG                  |
| TSP1-46              | TTCGAGCTAACTGTAGAATCCACCG                  |
| TSP1-47              | GTGGGGCCGATGAATTTCTTTCAGA                  |
| TSP1-48              | CTCAAGGGACATGTTGGTGCTTTTC                  |
| TSP1-49              | ATGCTGTCTTTGTTTCTGCTTGCA                   |
| API                  | CATACGAGATCGTGATGTGACTGGAG                 |
| TSP2-14              | TACACGACGCTCTTCCGATCTATGGATCTCGCCGACCCAAA  |
| TSP2-15              | TACACGACGCTCTTCCGATCTTCATCTTCCCCTACCTCCCA  |
| TSP2-16              | TACACGACGCTCTTCCGATCTTAATCATGCTGCTCCGCCAG  |
| TSP2-17              | TACACGACGCTCTTCCGATCTGAGTTTGAACAACCTCGTCAC |
| TSP2-18              | TACACGACGCTCTTCCGATCTAAGCATGGATCAGCTTACAA  |
| TSP2-19              | TACACGACGCTCTTCCGATCTTGGGAAAGGAGTTGCGAGAG  |
| TSP2-20              | TACACGACGCTCTTCCGATCTCTGAGCAGGATAGGTTGATG  |
| TSP2-21              | TACACGACGCTCTTCCGATCTGGTAAGATCATCAGTAACTC  |
| TSP2-22              | TACACGACGCTCTTCCGATCTAGAACATGTTGACGAGGTT   |
| TSP2-23              | TACACGACGCTCTTCCGATCTCTGACCATCACTAGTCTCGT  |
| TSP2-24              | TACACGACGCTCTTCCGATCTATGGCGTAGTGGACATAAAG  |
| TSP2-25              | TACACGACGCTCTTCCGATCTAGATGACCACACTGACTCAC  |
| TSP2-26              | TACACGACGCTCTTCCGATCTACCCGTTGTGAATTGCATCG  |
| TSP2-27              | TACACGACGCTCTTCCGATCTGGCATCACCTACATGTTCTG  |
| TSP2-28              | TACACGACGCTCTTCCGATCTATCGTCACAGATCACTATGG  |
| TSP2-29              | TACACGACGCTCTTCCGATCTATTGCAAGAGGAGGAAGGAG  |
| TSP2-30              | TACACGACGCTCTTCCGATCTGGTGATGGGGACGATGTTTG  |
| TSP2-31              | TACACGACGCTCTTCCGATCTTGCATCAAGGAGACCCTACG  |
| TSP2-32              | TACACGACGCTCTTCCGATCTCAATTACCCTCAATCCAAAG  |
| TSP2-33              | TACACGACGCTCTTCCGATCTTCTCAGGCCATTGCCTACTC  |
| TSP2-34              | TACACGACGCTCTTCCGATCTAGCATGCCTACTAACTCATG  |
| TSP2-35              | TACACGACGCTCTTCCGATCTTCTGGTTCTCCGCCATAGCC  |
| TSP2-36              | TACACGACGCTCTTCCGATCTTGGATCTGAAACGCGAGCTC  |
| TSP2-37              | TACACGACGCTCTTCCGATCTTTCACCAAGCAGTACCACTG  |
| TSP2-38              | TACACGACGCTCTTCCGATCTAATTACTGAGGTCGTGGAAG  |
| TSP2-39              | TACACGACGCTCTTCCGATCTGTCGTCCTTGTCATTGGAACA |
| TSP2-40              | TACACGACGCTCTTCCGATCTGATCCTAAGAAGCGAGCCTT  |
| TSP2-41              | TACACGACGCTCTTCCGATCTTTGGTACAGGAAGATCTTCG  |
| TSP2-42              | TACACGACGCTCTTCCGATCTTAACCACTGGTTGGAGCTCC  |
| TSP2-43              | TACACGACGCTCTTCCGATCTTACGTGAGATATGCCGCTAC  |
| TSP2-44              | TACACGACGCTCTTCCGATCTCTGTTCACTCCCGTGTATAG  |

(To be continued)

**Supplementary Table 2. Adaptors and primers used in mutation discovery from the sodium azide induced rice population (*continued*)**

| Primers and adaptors | Sequence(5'-3')                                           |
|----------------------|-----------------------------------------------------------|
| TSP2-45              | TACACGACGCTCTTCCGATCTACCGACGGACGGATCGATAT                 |
| TSP2-46              | TACACGACGCTCTTCCGATCTTCGCCTTCAGGTGGATGTTT                 |
| TSP2-47              | TACACGACGCTCTTCCGATCTGCTCTCTATATCACTGGATC                 |
| TSP2-48              | TACACGACGCTCTTCCGATCTTTTCCACAGGGCGATTCTGG                 |
| TSP2-49              | TACACGACGCTCTTCCGATCTCGTTATCCGCGATCATTGT                  |
| AP2                  | GATGTGACTGGAGTTCAGACGTGT                                  |
| AP3F                 | CAAGCAGAAGACGGCATAACGAGATCGTGATGTGACTGGAGTTCAGACGT        |
| AP3R                 | AATGATACGGCGACCACCGAGATCTACACTCTTCCCTACACGACGCTCTTCCGATCT |

In the first round PCR, the forward primers of the first primer set were TSP1-14, TSP1-15, ..., TSP1-25; the forward primers of the second set were TSP1-26, TSP1-27, ..., TSP1-37; the forward primers of the third set were TSP1-28, TSP1-29, ... TSP1-49. The reverse primer was AP1, which was universal for all of the first round PCRs. In the second round PCRs, the forward primers for each primer set were similar to the first round PCRs, with TSP2-14 instead of TSP 1-14, TSP2-15 instead of TSP1-15, ..., TSP2-49 instead of TSP1-49. The reverse primer was AP2, which was universal for all of the second round PCRs.

**Supplementary Table 3. Ratio of on-target reads**

| Bulks | Ratio(%) | Bulks | Ratio(%) | Bulks | Ratio(%) |
|-------|----------|-------|----------|-------|----------|
| AX1   | 57.50    | AZ1   | 25.44    | BY1   | 56.51    |
| AX2   | 60.91    | AZ2   | 60.16    | BY2   | 60.70    |
| AX3   | 63.17    | AZ3   | 59.24    | BY3   | 54.12    |
| AX4   | 60.11    | AZ4   | 56.85    | BY4   | 54.53    |
| AX5   | 62.62    | AZ5   | 43.52    | BY5   | 58.82    |
| AX6   | 58.58    | AZ6   | 25.67    | BY6   | 65.34    |
| AX7   | 63.03    | AZ7   | 31.44    | BY7   | 67.27    |
| AX8   | 60.20    | AZ8   | 54.43    | BY8   | 64.67    |
| AY1   | 16.88    | BX1   | 65.39    | BZ1   | 60.66    |
| AY2   | 52.01    | BX2   | 67.23    | BZ2   | 42.20    |
| AY3   | 13.44    | BX3   | 65.30    | BZ3   | 42.14    |
| AY4   | 61.36    | BX4   | 73.87    | BZ4   | 51.75    |
| AY5   | 64.33    | BX5   | 67.51    | BZ5   | 62.00    |
| AY6   | 64.89    | BX6   | 67.43    | BZ6   | 54.52    |
| AY7   | 64.45    | BX7   | 67.67    | BZ7   | 55.80    |
| AY8   | 62.93    | BX8   | 67.87    | BZ8   | 60.83    |



**Supplementary Table 4. Summary of the enriched fragment length of Pool A**

| Fragments                                       | Dimensions | Bulks (bp) |     |     |     |     |     |     |                    | Total (average) screened fragment length (bp)* |
|-------------------------------------------------|------------|------------|-----|-----|-----|-----|-----|-----|--------------------|------------------------------------------------|
|                                                 |            | 1          | 2   | 3   | 4   | 5   | 6   | 7   | 8                  |                                                |
| Os11g32240-1                                    | X          | 0          | 105 | 122 | 105 | 117 | 115 | 105 | 113                | 16,584<br>(33)                                 |
|                                                 | Y          | 0          | 114 | 0   | 99  | 85  | 113 | 99  | 109                |                                                |
|                                                 | Z          | 0          | 113 | 128 | 118 | 0   | 0   | 0   | 91                 |                                                |
| Os11g32240-2                                    | X          | 114        | 160 | 162 | 162 | 184 | 162 | 162 | 162                | 17,584<br>(35)                                 |
|                                                 | Y          | 86         | 117 | 0   | 0   | 174 | 169 | 147 | 160                |                                                |
|                                                 | Z          | 68         | 133 | 135 | 108 | 0   | 0   | 0   | 0                  |                                                |
| Os11g32240-3                                    | X          | 154        | 201 | 209 | 201 | 237 | 217 | 197 | 202                | 66,697<br>(130)                                |
|                                                 | Y          | 139        | 185 | 124 | 152 | 190 | 227 | 185 | 192                |                                                |
|                                                 | Z          | 148        | 218 | 251 | 222 | 137 | 131 | 134 | 135                |                                                |
| Os05g12040-1                                    | X          | 171        | 178 | 193 | 195 | 188 | 200 | 197 | 204                | 65,736<br>(129)                                |
|                                                 | Y          | 126        | 171 | 120 | 200 | 160 | 174 | 169 | 174                |                                                |
|                                                 | Z          | 135        | 187 | 197 | 147 | 204 | 134 | 131 | 178                |                                                |
| Os07g28110-1                                    | X          | 106        | 106 | 111 | 106 | 108 | 108 | 106 | 111                | 46,532<br>(91)                                 |
|                                                 | Y          | 106        | 111 | 101 | 114 | 106 | 107 | 106 | 108                |                                                |
|                                                 | Z          | 106        | 111 | 108 | 94  | 106 | 103 | 106 | 120                |                                                |
| Os07g28110-2                                    | X          | 152        | 154 | 152 | 154 | 161 | 159 | 169 | 220                | 56,719<br>(111)                                |
|                                                 | Y          | 98         | 178 | 63  | 232 | 169 | 156 | 154 | 159                |                                                |
|                                                 | Z          | 118        | 179 | 243 | 163 | 231 | 99  | 128 | 220                |                                                |
| Os07g28110-3                                    | X          | 110        | 114 | 128 | 112 | 178 | 116 | 175 | 210                | 16,214<br>(32)                                 |
|                                                 | Y          | 108        | 202 | 105 | 247 | 178 | 178 | 177 | 183                |                                                |
|                                                 | Z          | 110        | 209 | 246 | 183 | 229 | 110 | 112 | 210                |                                                |
| Os02g21810-1                                    | X          | 0          | 0   | 0   | 0   | 0   | 0   | 0   | 0                  | 0<br>(0)                                       |
|                                                 | Y          | 0          | 99  | 0   | 195 | 0   | 0   | 0   | 0                  |                                                |
|                                                 | Z          | 0          | 0   | 193 | 32  | 99  | 0   | 0   | 87                 |                                                |
| Os02g21810-2                                    | X          | 180        | 183 | 182 | 183 | 182 | 182 | 188 | 210                | 66,850<br>(131)                                |
|                                                 | Y          | 110        | 214 | 99  | 239 | 188 | 185 | 185 | 188                |                                                |
|                                                 | Z          | 134        | 214 | 251 | 193 | 224 | 122 | 134 | 215                |                                                |
| Os02g02230-1                                    | X          | 148        | 142 | 159 | 144 | 160 | 173 | 169 | 187                | 61,208<br>(120)                                |
|                                                 | Y          | 119        | 194 | 111 | 229 | 167 | 161 | 155 | 149                |                                                |
|                                                 | Z          | 125        | 173 | 216 | 160 | 213 | 124 | 125 | 194                |                                                |
| Os02g02230-2                                    | X          | 127        | 115 | 127 | 109 | 131 | 134 | 128 | 156                | 43,587<br>(83)                                 |
|                                                 | Y          | 94         | 155 | 0   | 198 | 132 | 124 | 123 | 129                |                                                |
|                                                 | Z          | 99         | 145 | 212 | 127 | 167 | 95  | 100 | 150                |                                                |
| Os02g02230-3                                    | X          | 146        | 161 | 151 | 146 | 168 | 172 | 183 | 197                | 62,740<br>(123)                                |
|                                                 | Y          | 120        | 194 | 111 | 230 | 189 | 171 | 146 | 153                |                                                |
|                                                 | Z          | 135        | 192 | 236 | 193 | 216 | 114 | 135 | 201                |                                                |
| Subtotal of the first 12-plex nested PCR region |            |            |     |     |     |     |     |     | 520,451<br>(1,017) |                                                |

*(To be continued)*

**Supplementary Table 4. Summary of the enriched fragment length of Pool A (continued)**

| Fragment                                         | Dimension | Bulk (bp) |     |     |     |     |     |     |                    | Total (average)<br>screened fragment<br>length (bp)* |
|--------------------------------------------------|-----------|-----------|-----|-----|-----|-----|-----|-----|--------------------|------------------------------------------------------|
|                                                  |           | 1         | 2   | 3   | 4   | 5   | 6   | 7   | 8                  |                                                      |
| Os05g34325-1                                     | X         | 150       | 162 | 167 | 152 | 175 | 170 | 185 | 203                | 65,246                                               |
|                                                  | Y         | 120       | 206 | 114 | 247 | 158 | 162 | 162 | 176                | (127)                                                |
|                                                  | Z         | 136       | 196 | 262 | 183 | 229 | 141 | 138 | 213                |                                                      |
| Os05g34325-2                                     | X         | 194       | 202 | 210 | 194 | 208 | 215 | 217 | 230                | 80,537                                               |
|                                                  | Y         | 152       | 221 | 144 | 232 | 202 | 208 | 200 | 208                | (158)                                                |
|                                                  | Z         | 174       | 223 | 289 | 209 | 258 | 152 | 173 | 228                |                                                      |
| Os05g34325-3                                     | X         | 136       | 142 | 145 | 142 | 142 | 150 | 142 | 191                | 50,815                                               |
|                                                  | Y         | 92        | 207 | 46  | 254 | 156 | 148 | 142 | 146                | (100)                                                |
|                                                  | Z         | 102       | 192 | 258 | 192 | 234 | 90  | 104 | 188                |                                                      |
| Os05g34330-1                                     | X         | 92        | 135 | 147 | 142 | 173 | 147 | 149 | 145                | 41,435                                               |
|                                                  | Y         | 104       | 147 | 83  | 105 | 147 | 155 | 117 | 139                | (81)                                                 |
|                                                  | Z         | 116       | 168 | 173 | 168 | 102 | 82  | 0   | 100                |                                                      |
| Os05g34330-2                                     | X         | 150       | 213 | 211 | 205 | 237 | 211 | 205 | 205                | 57,673                                               |
|                                                  | Y         | 125       | 150 | 106 | 110 | 205 | 211 | 196 | 205                | (113)                                                |
|                                                  | Z         | 136       | 170 | 196 | 154 | 104 | 101 | 157 | 115                |                                                      |
| Os05g34330-3                                     | X         | 152       | 184 | 188 | 212 | 222 | 210 | 212 | 193                | 61,190                                               |
|                                                  | Y         | 147       | 184 | 126 | 161 | 212 | 217 | 184 | 188                | (120)                                                |
|                                                  | Z         | 157       | 221 | 228 | 210 | 141 | 132 | 134 | 140                |                                                      |
| Os05g34380-1                                     | X         | 0         | 0   | 101 | 71  | 124 | 101 | 101 | 101                | 6,315                                                |
|                                                  | Y         | 85        | 119 | 0   | 0   | 75  | 116 | 0   | 68                 | (13)                                                 |
|                                                  | Z         | 0         | 135 | 134 | 125 | 0   | 0   | 0   | 0                  |                                                      |
| Os05g34380-2                                     | X         | 153       | 159 | 167 | 172 | 194 | 177 | 172 | 168                | 54,103                                               |
|                                                  | Y         | 138       | 153 | 107 | 138 | 172 | 167 | 155 | 167                | (106)                                                |
|                                                  | Z         | 144       | 155 | 156 | 153 | 104 | 85  | 95  | 112                |                                                      |
| Os05g34380-3                                     | X         | 102       | 122 | 117 | 136 | 182 | 154 | 145 | 141                | 21,094                                               |
|                                                  | Y         | 95        | 117 | 0   | 82  | 168 | 154 | 112 | 117                | (42)                                                 |
|                                                  | Z         | 106       | 121 | 136 | 117 | 0   | 0   | 0   | 0                  |                                                      |
| Os07g37970-1                                     | X         | 0         | 93  | 106 | 98  | 107 | 98  | 88  | 99                 | 10,928                                               |
|                                                  | Y         | 0         | 99  | 0   | 99  | 0   | 99  | 72  | 99                 | (22)                                                 |
|                                                  | Z         | 0         | 103 | 112 | 101 | 0   | 0   | 0   | 100                |                                                      |
| Os07g37970-2                                     | X         | 155       | 200 | 221 | 210 | 228 | 221 | 210 | 214                | 73,552                                               |
|                                                  | Y         | 154       | 211 | 146 | 169 | 200 | 217 | 195 | 208                | (144)                                                |
|                                                  | Z         | 157       | 219 | 238 | 222 | 154 | 151 | 140 | 157                |                                                      |
| Os11g18194-1                                     | X         | 159       | 159 | 167 | 161 | 161 | 151 | 158 | 139                | 36,937                                               |
|                                                  | Y         | 36        | 143 | 75  | 0   | 153 | 161 | 158 | 158                | (73)                                                 |
|                                                  | Z         | 0         | 164 | 164 | 160 | 95  | 130 | 79  | 142                |                                                      |
| Subtotal of the second 12-plex nested PCR region |           |           |     |     |     |     |     |     | 559,825<br>(1,094) |                                                      |

*(To be continued)*

**Supplementary Table 4. Summary of the enriched fragment length of Pool A (continued)**

| Fragment                                        | Dimension | Bulk (bp) |     |     |     |     |     |     |     | Total (average) screened fragment length (bp)* |
|-------------------------------------------------|-----------|-----------|-----|-----|-----|-----|-----|-----|-----|------------------------------------------------|
|                                                 |           | 1         | 2   | 3   | 4   | 5   | 6   | 7   | 8   |                                                |
| Os11g18194-2                                    | X         | 0         | 82  | 0   | 101 | 134 | 115 | 101 | 93  | 1,020                                          |
|                                                 | Y         | 0         | 0   | 0   | 0   | 73  | 117 | 111 | 0   | (2)                                            |
|                                                 | Z         | 0         | 0   | 68  | 0   | 0   | 0   | 0   | 0   |                                                |
| Os11g18194-3                                    | X         | 95        | 94  | 95  | 99  | 107 | 102 | 96  | 99  | 23,293                                         |
|                                                 | Y         | 0         | 102 | 0   | 0   | 99  | 99  | 95  | 95  | (46)                                           |
|                                                 | Z         | 0         | 116 | 139 | 124 | 90  | 101 | 95  | 110 |                                                |
| Os11g18194-4                                    | X         | 125       | 127 | 123 | 137 | 158 | 132 | 134 | 120 | 15,976                                         |
|                                                 | Y         | 0         | 85  | 0   | 0   | 127 | 166 | 163 | 114 | (32)                                           |
|                                                 | Z         | 0         | 123 | 141 | 100 | 0   | 57  | 0   | 72  |                                                |
| Os11g18194-5                                    | X         | 89        | 119 | 85  | 117 | 157 | 148 | 123 | 125 | 7,557                                          |
|                                                 | Y         | 0         | 0   | 0   | 0   | 103 | 135 | 137 | 100 | (15)                                           |
|                                                 | Z         | 0         | 86  | 109 | 0   | 0   | 84  | 0   | 0   |                                                |
| Os11g18366-1                                    | X         | 150       | 172 | 183 | 170 | 180 | 150 | 169 | 134 | 34,932                                         |
|                                                 | Y         | 81        | 132 | 92  | 0   | 132 | 245 | 225 | 150 | (69)                                           |
|                                                 | Z         | 0         | 183 | 191 | 150 | 98  | 123 | 0   | 131 |                                                |
| Os11g18366-2                                    | X         | 0         | 0   | 0   | 93  | 102 | 0   | 81  | 72  | 2,532                                          |
|                                                 | Y         | 0         | 0   | 0   | 0   | 95  | 98  | 47  | 0   | (5)                                            |
|                                                 | Z         | 0         | 115 | 133 | 100 | 0   | 0   | 0   | 101 |                                                |
| Os11g18366-3                                    | X         | 53        | 86  | 106 | 124 | 126 | 126 | 118 | 107 | 12,970                                         |
|                                                 | Y         | 0         | 106 | 0   | 0   | 119 | 122 | 111 | 73  | (26)                                           |
|                                                 | Z         | 0         | 128 | 138 | 126 | 0   | 0   | 0   | 101 |                                                |
| Os06g28820-1                                    | X         | 83        | 116 | 120 | 120 | 162 | 124 | 116 | 120 | 10,803                                         |
|                                                 | Y         | 0         | 103 | 0   | 0   | 116 | 124 | 114 | 116 | (22)                                           |
|                                                 | Z         | 0         | 110 | 113 | 99  | 0   | 0   | 0   | 0   |                                                |
| Os06g28820-2                                    | X         | 166       | 171 | 176 | 182 | 182 | 180 | 182 | 162 | 39,690                                         |
|                                                 | Y         | 120       | 122 | 107 | 0   | 180 | 203 | 196 | 166 | (78)                                           |
|                                                 | Z         | 119       | 160 | 157 | 140 | 79  | 101 | 0   | 102 |                                                |
| Os06g28820-3                                    | X         | 99        | 106 | 103 | 112 | 145 | 126 | 110 | 123 | 18,533                                         |
|                                                 | Y         | 0         | 100 | 0   | 0   | 105 | 111 | 111 | 105 | (37)                                           |
|                                                 | Z         | 0         | 110 | 145 | 105 | 27  | 88  | 0   | 100 |                                                |
| Os06g28820-4                                    | X         | 116       | 120 | 124 | 134 | 145 | 139 | 134 | 116 | 35,579                                         |
|                                                 | Y         | 100       | 109 | 90  | 0   | 132 | 143 | 140 | 114 | (70)                                           |
|                                                 | Z         | 87        | 130 | 132 | 111 | 99  | 106 | 0   | 111 |                                                |
| Os06g28820-5                                    | X         | 147       | 147 | 147 | 169 | 159 | 146 | 162 | 142 | 49,344                                         |
|                                                 | Y         | 99        | 139 | 89  | 58  | 162 | 177 | 164 | 142 | (97)                                           |
|                                                 | Z         | 83        | 189 | 209 | 185 | 107 | 135 | 111 | 142 |                                                |
| Subtotal of the third 12-plex nested PCR region |           |           |     |     |     |     |     |     |     | 252,229<br>(493)                               |
| <b>Total</b>                                    |           |           |     |     |     |     |     |     |     | <b>1,332,505</b><br><b>(2603)</b>              |

\* The total screened fragment length for a particular fragment was calculated by adding the length of the enriched fragments of each of the 512 individuals for this fragment. An individual was presented in 3 bulks, 1 in X, 1 in Y and 1 in Z. In each bulk, the fragment had a starting base position and an ending base position, which indicated the region of the enriched fragment. The valid screened fragment length of this individual for this fragment was calculated by using the minimum value of the 3 ending base positions (1 in X, 1 in Y and 1 in Z) minus the maximum value of the 3 starting base positions. In this way, the resulting length represents the number of bases, of this individual for this fragment, that were presented in all of the 3 bulks, which were the premise to determine whether a base was mutated or not.

**Supplementary Table 5. Summary of the enriched fragment length of Pool B**

| Fragments                                       | Dimensions | Bulks (bp) |     |     |     |     |     |     |                    | Total (average)<br>screened fragment<br>length (bp)* |
|-------------------------------------------------|------------|------------|-----|-----|-----|-----|-----|-----|--------------------|------------------------------------------------------|
|                                                 |            | 1          | 2   | 3   | 4   | 5   | 6   | 7   | 8                  |                                                      |
| Os11g32240-1                                    | X          | 89         | 105 | 102 | 109 | 105 | 105 | 105 | 99                 | 10,254                                               |
|                                                 | Y          | 0          | 0   | 0   | 0   | 0   | 105 | 102 | 80                 | (20)                                                 |
|                                                 | Z          | 107        | 0   | 0   | 60  | 106 | 102 | 0   | 89                 |                                                      |
| Os11g32240-2                                    | X          | 120        | 152 | 135 | 181 | 145 | 127 | 146 | 108                | 19,236                                               |
|                                                 | Y          | 0          | 0   | 0   | 0   | 108 | 146 | 137 | 120                | (38)                                                 |
|                                                 | Z          | 180        | 124 | 0   | 150 | 180 | 170 | 0   | 76                 |                                                      |
| Os11g32240-3                                    | X          | 185        | 193 | 186 | 215 | 190 | 185 | 189 | 173                | 62,151                                               |
|                                                 | Y          | 122        | 129 | 131 | 126 | 145 | 190 | 190 | 182                | (122)                                                |
|                                                 | Z          | 198        | 179 | 102 | 185 | 198 | 198 | 125 | 138                |                                                      |
| Os05g12040-1                                    | X          | 171        | 174 | 171 | 173 | 171 | 171 | 171 | 171                | 68,538                                               |
|                                                 | Y          | 176        | 169 | 150 | 145 | 195 | 205 | 175 | 169                | (134)                                                |
|                                                 | Z          | 171        | 126 | 149 | 144 | 172 | 147 | 171 | 171                |                                                      |
| Os07g28110-1                                    | X          | 110        | 110 | 106 | 109 | 107 | 110 | 106 | 106                | 47,552                                               |
|                                                 | Y          | 109        | 107 | 107 | 106 | 106 | 110 | 107 | 106                | (93)                                                 |
|                                                 | Z          | 107        | 106 | 106 | 105 | 108 | 107 | 107 | 110                |                                                      |
| Os07g28110-2                                    | X          | 220        | 215 | 218 | 249 | 229 | 229 | 227 | 220                | 59,140                                               |
|                                                 | Y          | 156        | 177 | 130 | 104 | 227 | 220 | 220 | 221                | (116)                                                |
|                                                 | Z          | 227        | 70  | 128 | 99  | 177 | 130 | 157 | 159                |                                                      |
| Os07g28110-3                                    | X          | 221        | 221 | 210 | 260 | 236 | 236 | 227 | 231                | 29,193                                               |
|                                                 | Y          | 179        | 196 | 116 | 113 | 217 | 236 | 218 | 239                | (57)                                                 |
|                                                 | Z          | 212        | 110 | 113 | 111 | 190 | 114 | 172 | 178                |                                                      |
| Os02g21810-1                                    | X          | 112        | 162 | 0   | 99  | 59  | 11  | 0   | 99                 | 741                                                  |
|                                                 | Y          | 0          | 0   | 0   | 0   | 0   | 124 | 171 | 222                | (2)                                                  |
|                                                 | Z          | 59         | 0   | 0   | 0   | 0   | 0   | 0   | 0                  |                                                      |
| Os02g21810-2                                    | X          | 238        | 242 | 233 | 244 | 242 | 241 | 233 | 224                | 67,634                                               |
|                                                 | Y          | 195        | 210 | 133 | 112 | 224 | 242 | 242 | 251                | (132)                                                |
|                                                 | Z          | 224        | 108 | 138 | 110 | 224 | 134 | 188 | 181                |                                                      |
| Os02g02230-1                                    | X          | 185        | 177 | 181 | 223 | 210 | 189 | 189 | 185                | 63,423                                               |
|                                                 | Y          | 164        | 182 | 129 | 125 | 183 | 189 | 189 | 185                | (124)                                                |
|                                                 | Z          | 194        | 115 | 140 | 125 | 171 | 130 | 155 | 161                |                                                      |
| Os02g02230-2                                    | X          | 149        | 149 | 146 | 221 | 171 | 162 | 163 | 163                | 51,423                                               |
|                                                 | Y          | 131        | 149 | 107 | 99  | 158 | 163 | 149 | 157                | (101)                                                |
|                                                 | Z          | 159        | 93  | 108 | 100 | 140 | 106 | 129 | 131                |                                                      |
| Os02g02230-3                                    | X          | 203        | 199 | 199 | 239 | 214 | 208 | 207 | 206                | 62,726                                               |
|                                                 | Y          | 169        | 189 | 126 | 105 | 201 | 204 | 201 | 201                | (122)                                                |
|                                                 | Z          | 206        | 110 | 133 | 111 | 191 | 133 | 169 | 154                |                                                      |
| Subtotal of the first 12-plex nested PCR region |            |            |     |     |     |     |     |     | 542,011<br>(1,059) |                                                      |

*(To be continued)*

**Supplementary Table 5. Summary of the enriched fragment length of Pool B (continued)**

| Fragments                                        | Dimensions | Bulks (bp) |     |     |     |     |     |     |     | Total (average) screened fragment length (bp) * |
|--------------------------------------------------|------------|------------|-----|-----|-----|-----|-----|-----|-----|-------------------------------------------------|
|                                                  |            | 1          | 2   | 3   | 4   | 5   | 6   | 7   | 8   |                                                 |
| Os05g34325-1                                     | X          | 215        | 209 | 206 | 262 | 247 | 245 | 247 | 229 | 57,345<br>(112)                                 |
|                                                  | Y          | 167        | 206 | 148 | 144 | 216 | 235 | 220 | 229 |                                                 |
|                                                  | Z          | 219        | 123 | 147 | 143 | 189 | 148 | 160 | 162 |                                                 |
| Os05g34325-2                                     | X          | 230        | 225 | 223 | 292 | 245 | 230 | 245 | 231 | 55,780<br>(109)                                 |
|                                                  | Y          | 197        | 225 | 179 | 152 | 230 | 234 | 225 | 225 |                                                 |
|                                                  | Z          | 253        | 142 | 196 | 161 | 218 | 185 | 194 | 194 |                                                 |
| Os05g34325-3                                     | X          | 222        | 216 | 196 | 265 | 235 | 222 | 226 | 239 | 49,699<br>(97)                                  |
|                                                  | Y          | 150        | 166 | 109 | 90  | 222 | 232 | 222 | 235 |                                                 |
|                                                  | Z          | 212        | 0   | 110 | 92  | 168 | 108 | 142 | 145 |                                                 |
| Os05g34330-1                                     | X          | 102        | 114 | 111 | 152 | 133 | 111 | 123 | 111 | 26,382<br>(52)                                  |
|                                                  | Y          | 0          | 85  | 92  | 80  | 55  | 106 | 114 | 101 |                                                 |
|                                                  | Z          | 154        | 111 | 0   | 145 | 143 | 154 | 0   | 100 |                                                 |
| Os05g34330-2                                     | X          | 182        | 205 | 196 | 224 | 197 | 177 | 205 | 163 | 59,267<br>(116)                                 |
|                                                  | Y          | 110        | 119 | 124 | 113 | 154 | 203 | 196 | 163 |                                                 |
|                                                  | Z          | 222        | 168 | 104 | 194 | 208 | 205 | 109 | 133 |                                                 |
| Os05g34330-3                                     | X          | 166        | 188 | 183 | 222 | 188 | 165 | 188 | 161 | 60,931<br>(119)                                 |
|                                                  | Y          | 124        | 120 | 130 | 121 | 159 | 187 | 187 | 161 |                                                 |
|                                                  | Z          | 220        | 169 | 102 | 178 | 217 | 212 | 126 | 141 |                                                 |
| Os05g34380-1                                     | X          | 0          | 0   | 0   | 86  | 0   | 0   | 0   | 0   | 0<br>(0)                                        |
|                                                  | Y          | 0          | 0   | 0   | 0   | 0   | 0   | 0   | 0   |                                                 |
|                                                  | Z          | 119        | 0   | 0   | 118 | 97  | 128 | 0   | 0   |                                                 |
| Os05g34380-2                                     | X          | 147        | 167 | 162 | 180 | 167 | 167 | 167 | 143 | 55,035<br>(108)                                 |
|                                                  | Y          | 107        | 120 | 116 | 112 | 144 | 167 | 155 | 153 |                                                 |
|                                                  | Z          | 193        | 147 | 83  | 160 | 172 | 167 | 111 | 140 |                                                 |
| Os05g34380-3                                     | X          | 102        | 112 | 112 | 175 | 121 | 112 | 117 | 102 | 24,124<br>(47)                                  |
|                                                  | Y          | 0          | 75  | 0   | 77  | 104 | 112 | 112 | 102 |                                                 |
|                                                  | Z          | 170        | 112 | 0   | 125 | 147 | 152 | 0   | 100 |                                                 |
| Os07g37970-1                                     | X          | 92         | 100 | 78  | 99  | 95  | 98  | 94  | 98  | 10,369<br>(21)                                  |
|                                                  | Y          | 0          | 0   | 67  | 0   | 0   | 99  | 99  | 78  |                                                 |
|                                                  | Z          | 59         | 0   | 0   | 64  | 96  | 97  | 0   | 95  |                                                 |
| Os07g37970-2                                     | X          | 169        | 203 | 188 | 212 | 197 | 177 | 203 | 183 | 69,492<br>(136)                                 |
|                                                  | Y          | 144        | 154 | 154 | 154 | 154 | 199 | 198 | 177 |                                                 |
|                                                  | Z          | 210        | 164 | 131 | 188 | 210 | 205 | 141 | 157 |                                                 |
| Os11g18194-1                                     | X          | 134        | 130 | 122 | 139 | 120 | 115 | 103 | 109 | 53,624<br>(105)                                 |
|                                                  | Y          | 138        | 158 | 139 | 147 | 149 | 153 | 156 | 157 |                                                 |
|                                                  | Z          | 156        | 157 | 158 | 157 | 157 | 158 | 161 | 158 |                                                 |
| Subtotal of the second 12-plex nested PCR region |            |            |     |     |     |     |     |     |     | 522,048<br>(1020)                               |

*(To be continued)*

**Supplementary Table 5. Summary of the enriched fragment length of Pool B (continued)**

| Fragments                                       | Dimensions | Bulks (bp) |     |     |     |     |     |     |     | Total (average) screened fragment length (bp) * |
|-------------------------------------------------|------------|------------|-----|-----|-----|-----|-----|-----|-----|-------------------------------------------------|
|                                                 |            | 1          | 2   | 3   | 4   | 5   | 6   | 7   | 8   |                                                 |
| Os11g18194-2                                    | X          | 120        | 134 | 147 | 164 | 142 | 153 | 154 | 177 | 17,087<br>(34)                                  |
|                                                 | Y          | 147        | 170 | 156 | 161 | 111 | 93  | 115 | 126 |                                                 |
|                                                 | Z          | 76         | 0   | 0   | 0   | 0   | 0   | 101 | 153 |                                                 |
| Os11g18194-3                                    | X          | 100        | 100 | 100 | 102 | 99  | 110 | 105 | 110 | 43,908<br>(86)                                  |
|                                                 | Y          | 99         | 127 | 100 | 138 | 99  | 95  | 99  | 99  |                                                 |
|                                                 | Z          | 124        | 99  | 99  | 92  | 99  | 99  | 99  | 114 |                                                 |
| Os11g18194-4                                    | X          | 181        | 175 | 177 | 221 | 181 | 189 | 194 | 217 | 56,292<br>(110)                                 |
|                                                 | Y          | 175        | 210 | 193 | 214 | 157 | 157 | 181 | 181 |                                                 |
|                                                 | Z          | 120        | 88  | 112 | 122 | 118 | 118 | 153 | 185 |                                                 |
| Os11g18194-5                                    | X          | 138        | 139 | 150 | 167 | 147 | 160 | 163 | 181 | 18,332<br>(36)                                  |
|                                                 | Y          | 148        | 165 | 165 | 159 | 122 | 115 | 137 | 151 |                                                 |
|                                                 | Z          | 0          | 0   | 0   | 73  | 0   | 0   | 115 | 151 |                                                 |
| Os11g18366-1                                    | X          | 191        | 188 | 183 | 229 | 186 | 189 | 183 | 191 | 77,410<br>(152)                                 |
|                                                 | Y          | 202        | 265 | 207 | 208 | 169 | 190 | 233 | 233 |                                                 |
|                                                 | Z          | 172        | 144 | 150 | 180 | 183 | 183 | 240 | 268 |                                                 |
| Os11g18366-2                                    | X          | 115        | 105 | 107 | 121 | 106 | 123 | 113 | 178 | 32,622<br>(64)                                  |
|                                                 | Y          | 102        | 189 | 106 | 139 | 102 | 103 | 104 | 103 |                                                 |
|                                                 | Z          | 115        | 95  | 92  | 0   | 102 | 99  | 102 | 121 |                                                 |
| Os11g18366-3                                    | X          | 114        | 114 | 126 | 138 | 124 | 132 | 133 | 142 | 46,515<br>(91)                                  |
|                                                 | Y          | 130        | 138 | 135 | 138 | 107 | 80  | 105 | 120 |                                                 |
|                                                 | Z          | 126        | 85  | 107 | 111 | 100 | 103 | 119 | 138 |                                                 |
| Os06g28820-1                                    | X          | 99         | 117 | 111 | 140 | 115 | 110 | 115 | 99  | 12,491<br>(25)                                  |
|                                                 | Y          | 0          | 0   | 0   | 95  | 83  | 116 | 112 | 99  |                                                 |
|                                                 | Z          | 140        | 106 | 0   | 109 | 140 | 120 | 0   | 0   |                                                 |
| Os06g28820-2                                    | X          | 211        | 205 | 209 | 235 | 209 | 230 | 227 | 244 | 76,493<br>(150)                                 |
|                                                 | Y          | 202        | 234 | 219 | 224 | 200 | 188 | 209 | 209 |                                                 |
|                                                 | Z          | 166        | 148 | 160 | 171 | 166 | 160 | 188 | 225 |                                                 |
| Os06g28820-3                                    | X          | 105        | 107 | 118 | 139 | 111 | 136 | 135 | 149 | 45,418<br>(89)                                  |
|                                                 | Y          | 135        | 136 | 141 | 148 | 96  | 89  | 94  | 102 |                                                 |
|                                                 | Z          | 148        | 93  | 101 | 101 | 102 | 105 | 110 | 140 |                                                 |
| Os06g28820-4                                    | X          | 150        | 152 | 151 | 173 | 149 | 173 | 153 | 164 | 57,588<br>(113)                                 |
|                                                 | Y          | 147        | 184 | 164 | 169 | 143 | 144 | 146 | 146 |                                                 |
|                                                 | Z          | 116        | 109 | 120 | 134 | 134 | 124 | 142 | 163 |                                                 |
| Os06g28820-5                                    | X          | 178        | 175 | 183 | 195 | 182 | 191 | 192 | 228 | 70,501<br>(138)                                 |
|                                                 | Y          | 183        | 217 | 191 | 217 | 171 | 156 | 174 | 169 |                                                 |
|                                                 | Z          | 170        | 149 | 147 | 147 | 150 | 150 | 175 | 194 |                                                 |
| Subtotal of the third 12-plex nested PCR region |            |            |     |     |     |     |     |     |     | 554,657<br>(1084)                               |
| Total                                           |            |            |     |     |     |     |     |     |     | <b>1,618,716<br/>(3162)</b>                     |

\* The total screened fragment length for a particular fragment was calculated by adding the length of the enriched fragments of each of the 512 individuals for this fragment. An individual was presented in 3 bulks, 1 in X, 1 in Y and 1 in Z. In each bulk, the fragment had a starting base position and an ending base position, which indicated the region of the enriched fragment. The valid screened fragment length of this individual for this fragment was calculated by using the minimum value of the 3 ending base positions (1 in X, 1 in Y and 1 in Z) minus the maximum value of the 3 starting base positions. In this way, the resulting length represents the number of bases, of this individual for this fragment, that were presented in all of the 3 bulks, which were the premise to determine whether a base was mutated or not.



**Supplementary Table 6. Number of candidate mutations remaining after each filtering step in Pool A**

| Fragments    | Raw   | MiSD<br>(512) | MiMR<br>( $3.02 \times 10^{-3}$ ) | 1X1Y1Z | Candidate<br>mutations | <i>t</i> -test of<br>significance | Mutation<br>types |
|--------------|-------|---------------|-----------------------------------|--------|------------------------|-----------------------------------|-------------------|
| Os11g32240-1 | 1,386 | 767           | 1                                 | 0      | 0                      | 0                                 | C to T            |
| Os11g32240-2 | 1,843 | 870           | 1                                 | 0      | 0                      | 0                                 | C to T            |
| Os11g32240-3 | 2,613 | 1,547         | 3                                 | 3      | 1                      | 1                                 | C to T            |
| Os05g12040-1 | 1,982 | 1,458         | 7                                 | 0      | 0                      | 0                                 | C to T            |
| Os07g28110-1 | 1,028 | 696           | 1                                 | 0      | 0                      | 0                                 | C to T            |
| Os07g28110-2 | 1,986 | 1,059         | 3                                 | 0      | 0                      | 0                                 | C to T            |
| Os07g28110-3 | 2,172 | 1,062         | 3                                 | 0      | 0                      | 0                                 | C to T            |
| Os02g21810-1 | 1,950 | 208           | 1                                 | 0      | 0                      | 0                                 | C to T            |
| Os02g21810-2 | 2,278 | 1,268         | 0                                 | 0      | 0                      | 0                                 | C to T            |
| Os02g02230-1 | 1,984 | 920           | 2                                 | 0      | 0                      | 0                                 | C to T            |
| Os02g02230-2 | 1,984 | 648           | 0                                 | 0      | 0                      | 0                                 | C to T            |
| Os02g02230-3 | 1,982 | 1,295         | 4                                 | 3      | 1                      | 1                                 | C to T            |
| Os05g34325-1 | 2,166 | 1,183         | 0                                 | 0      | 0                      | 0                                 | C to T            |
| Os05g34325-2 | 2,670 | 1,275         | 9                                 | 0      | 0                      | 0                                 | C to T            |
| Os05g34325-3 | 2,111 | 1,150         | 4                                 | 3      | 1                      | 1                                 | C to T            |
| Os05g34330-1 | 1,584 | 853           | 2                                 | 0      | 0                      | 0                                 | C to T            |
| Os05g34330-2 | 2,569 | 1,148         | 4                                 | 0      | 0                      | 0                                 | C to T            |
| Os05g34330-3 | 1,743 | 1,293         | 3                                 | 3      | 1                      | 1                                 | C to T            |
| Os05g34380-1 | 1,261 | 362           | 6                                 | 0      | 0                      | 0                                 | C to T            |
| Os05g34380-2 | 1,676 | 917           | 0                                 | 0      | 0                      | 0                                 | C to T            |
| Os05g34380-3 | 1,235 | 451           | 3                                 | 0      | 0                      | 0                                 | C to T            |
| Os07g37970-1 | 1,236 | 469           | 5                                 | 0      | 0                      | 0                                 | C to T            |
| Os07g37970-2 | 2,793 | 1,717         | 9                                 | 0      | 0                      | 0                                 | C to T            |
| Os11g18194-1 | 1,267 | 806           | 1                                 | 0      | 0                      | 0                                 | C to T            |
| Os11g18194-2 | 913   | 184           | 0                                 | 0      | 0                      | 0                                 | C to T            |
| Os11g18194-3 | 529   | 175           | 0                                 | 0      | 0                      | 0                                 | C to T            |
| Os11g18194-4 | 984   | 441           | 16                                | 0      | 0                      | 0                                 | C to T            |
| Os11g18194-5 | 809   | 249           | 0                                 | 0      | 0                      | 0                                 | C to T            |
| Os11g18366-1 | 1,974 | 894           | 2                                 | 0      | 0                      | 0                                 | C to T            |
| Os11g18366-2 | 940   | 143           | 2                                 | 0      | 0                      | 0                                 | C to T            |
| Os11g18366-3 | 917   | 327           | 1                                 | 0      | 0                      | 0                                 | C to T            |
| Os06g28820-1 | 1,315 | 418           | 0                                 | 0      | 0                      | 0                                 | C to T            |
| Os06g28820-2 | 1,299 | 773           | 35                                | 0      | 0                      | 0                                 | C to T            |
| Os06g28820-3 | 1,059 | 524           | 0                                 | 0      | 0                      | 0                                 | C to T            |
| Os06g28820-4 | 841   | 417           | 15                                | 0      | 0                      | 0                                 | C to T            |
| Os06g28820-5 | 1,092 | 623           | 0                                 | 0      | 0                      | 0                                 | C to T            |
| Os11g32240-1 | 1,002 | 561           | 43                                | 4      | 2                      | 0                                 | G to A            |
| Os11g32240-2 | 1,403 | 630           | 178                               | 0      | 0                      | 0                                 | G to A            |
| Os11g32240-3 | 1,970 | 987           | 301                               | 14     | 6                      | 0                                 | G to A            |
| Os05g12040-1 | 1,725 | 1,195         | 316                               | 0      | 0                      | 0                                 | G to A            |

(To be continued)

**Supplementary Table 6. Number of candidate mutations remaining after each filtering step in Pool A (continued)**

| Fragments    | Raw     | MiSD<br>(512) | MiMR<br>( $3.02 \times 10^{-3}$ ) | 1X1Y1Z | Candidate<br>mutations | <i>t</i> -test of<br>significance | Mutation<br>types |
|--------------|---------|---------------|-----------------------------------|--------|------------------------|-----------------------------------|-------------------|
| Os07g28110-1 | 1,038   | 664           | 51                                | 0      | 0                      | 0                                 | G to A            |
| Os07g28110-2 | 2,357   | 1,251         | 327                               | 7      | 3                      | 0                                 | G to A            |
| Os07g28110-3 | 2,328   | 1,204         | 273                               | 0      | 0                      | 0                                 | G to A            |
| Os02g21810-1 | 2,227   | 236           | 36                                | 0      | 0                      | 0                                 | G to A            |
| Os02g21810-2 | 2,346   | 1,315         | 349                               | 0      | 0                      | 0                                 | G to A            |
| Os02g02230-1 | 1,821   | 925           | 188                               | 8      | 4                      | 0                                 | G to A            |
| Os02g02230-2 | 1,917   | 833           | 66                                | 0      | 0                      | 0                                 | G to A            |
| Os02g02230-3 | 1,759   | 841           | 199                               | 0      | 0                      | 0                                 | G to A            |
| Os05g34325-1 | 2,614   | 1,318         | 423                               | 0      | 0                      | 0                                 | G to A            |
| Os05g34325-2 | 2,472   | 1,431         | 531                               | 4      | 2                      | 0                                 | G to A            |
| Os05g34325-3 | 2,109   | 1,005         | 205                               | 3      | 1                      | 0                                 | G to A            |
| Os05g34330-1 | 1,491   | 643           | 127                               | 0      | 0                      | 0                                 | G to A            |
| Os05g34330-2 | 2,372   | 1,031         | 87                                | 0      | 0                      | 0                                 | G to A            |
| Os05g34330-3 | 2,061   | 1,137         | 308                               | 7      | 3                      | 0                                 | G to A            |
| Os05g34380-1 | 1,460   | 314           | 34                                | 3      | 1                      | 0                                 | G to A            |
| Os05g34380-2 | 1,582   | 902           | 128                               | 0      | 0                      | 0                                 | G to A            |
| Os05g34380-3 | 1,399   | 511           | 120                               | 0      | 0                      | 0                                 | G to A            |
| Os07g37970-1 | 1,673   | 626           | 106                               | 0      | 0                      | 0                                 | G to A            |
| Os07g37970-2 | 2,082   | 1,194         | 309                               | 0      | 0                      | 0                                 | G to A            |
| Os11g18194-1 | 1,729   | 1,086         | 271                               | 0      | 0                      | 0                                 | G to A            |
| Os11g18194-2 | 912     | 175           | 12                                | 0      | 0                      | 0                                 | G to A            |
| Os11g18194-3 | 824     | 207           | 9                                 | 0      | 0                      | 0                                 | G to A            |
| Os11g18194-4 | 1,238   | 446           | 80                                | 0      | 0                      | 0                                 | G to A            |
| Os11g18194-5 | 1,037   | 381           | 46                                | 0      | 0                      | 0                                 | G to A            |
| Os11g18366-1 | 1,960   | 924           | 278                               | 0      | 0                      | 0                                 | G to A            |
| Os11g18366-2 | 1,012   | 80            | 12                                | 0      | 0                      | 0                                 | G to A            |
| Os11g18366-3 | 927     | 373           | 43                                | 0      | 0                      | 0                                 | G to A            |
| Os06g28820-1 | 2,055   | 794           | 100                               | 3      | 1                      | 1                                 | G to A            |
| Os06g28820-2 | 1,223   | 726           | 209                               | 0      | 0                      | 0                                 | G to A            |
| Os06g28820-3 | 1,038   | 301           | 12                                | 0      | 0                      | 0                                 | G to A            |
| Os06g28820-4 | 1,103   | 663           | 103                               | 0      | 0                      | 0                                 | G to A            |
| Os06g28820-5 | 1,204   | 623           | 170                               | 0      | 0                      | 0                                 | G to A            |
| Sum          | 117,641 | 56,123        | 6,193                             | 65     | 27                     | 5                                 |                   |

**Supplementary Table 7. Number of candidate mutations remaining after each filtering step in Pool B**

| Fragments    | Raw   | MiSD<br>(512) | MiMR<br>(3.02x10 <sup>-3</sup> ) | 1X1Y1Z | Candidate<br>mutations | <i>t</i> -test of<br>significance | Mutation<br>types |
|--------------|-------|---------------|----------------------------------|--------|------------------------|-----------------------------------|-------------------|
| Os11g32240-1 | 1,284 | 637           | 2                                | 0      | 0                      | 0                                 | C to T            |
| Os11g32240-2 | 1,843 | 868           | 1                                | 0      | 0                      | 0                                 | C to T            |
| Os11g32240-3 | 2,367 | 1,438         | 6                                | 6      | 2                      | 2                                 | C to T            |
| Os05g12040-1 | 1,834 | 1,430         | 5                                | 3      | 1                      | 1                                 | C to T            |
| Os07g28110-1 | 1,020 | 692           | 0                                | 0      | 0                      | 0                                 | C to T            |
| Os07g28110-2 | 2,024 | 1,184         | 4                                | 0      | 0                      | 0                                 | C to T            |
| Os07g28110-3 | 2,253 | 1,199         | 12                               | 3      | 1                      | 0                                 | C to T            |
| Os02g21810-1 | 2,035 | 333           | 0                                | 0      | 0                      | 0                                 | C to T            |
| Os02g21810-2 | 2,256 | 1,397         | 1                                | 0      | 0                      | 0                                 | C to T            |
| Os02g02230-1 | 2,120 | 973           | 3                                | 3      | 1                      | 1                                 | C to T            |
| Os02g02230-2 | 2,259 | 718           | 0                                | 0      | 0                      | 0                                 | C to T            |
| Os02g02230-3 | 2,132 | 1,355         | 4                                | 0      | 0                      | 0                                 | C to T            |
| Os05g34325-1 | 2,190 | 1,302         | 1                                | 0      | 0                      | 0                                 | C to T            |
| Os05g34325-2 | 2,703 | 1,363         | 7                                | 0      | 0                      | 0                                 | C to T            |
| Os05g34325-3 | 2,211 | 1,294         | 0                                | 0      | 0                      | 0                                 | C to T            |
| Os05g34330-1 | 1,459 | 696           | 0                                | 0      | 0                      | 0                                 | C to T            |
| Os05g34330-2 | 2,331 | 1,248         | 1                                | 0      | 0                      | 0                                 | C to T            |
| Os05g34330-3 | 1,650 | 1,220         | 0                                | 0      | 0                      | 0                                 | C to T            |
| Os05g34380-1 | 1,094 | 135           | 2                                | 0      | 0                      | 0                                 | C to T            |
| Os05g34380-2 | 1,557 | 917           | 3                                | 3      | 1                      | 1                                 | C to T            |
| Os05g34380-3 | 1,110 | 418           | 1                                | 0      | 0                      | 0                                 | C to T            |
| Os07g37970-1 | 853   | 442           | 8                                | 3      | 1                      | 0                                 | C to T            |
| Os07g37970-2 | 2,417 | 1,591         | 4                                | 0      | 0                      | 0                                 | C to T            |
| Os11g18194-1 | 1,166 | 913           | 5                                | 0      | 0                      | 0                                 | C to T            |
| Os11g18194-2 | 1,314 | 474           | 1                                | 0      | 0                      | 0                                 | C to T            |
| Os11g18194-3 | 850   | 289           | 3                                | 0      | 0                      | 0                                 | C to T            |
| Os11g18194-4 | 1,077 | 782           | 22                               | 0      | 0                      | 0                                 | C to T            |
| Os11g18194-5 | 1,008 | 416           | 0                                | 0      | 0                      | 0                                 | C to T            |
| Os11g18366-1 | 2,072 | 1,377         | 0                                | 0      | 0                      | 0                                 | C to T            |
| Os11g18366-2 | 1,324 | 446           | 3                                | 0      | 0                      | 0                                 | C to T            |
| Os11g18366-3 | 1,171 | 498           | 1                                | 0      | 0                      | 0                                 | C to T            |
| Os06g28820-1 | 1,200 | 442           | 1                                | 0      | 0                      | 0                                 | C to T            |
| Os06g28820-2 | 1,457 | 1,079         | 52                               | 3      | 1                      | 1                                 | C to T            |
| Os06g28820-3 | 1,304 | 702           | 2                                | 0      | 0                      | 0                                 | C to T            |
| Os06g28820-4 | 1,056 | 556           | 24                               | 0      | 0                      | 0                                 | C to T            |
| Os06g28820-5 | 1,430 | 766           | 0                                | 0      | 0                      | 0                                 | C to T            |
| Os11g32240-1 | 892   | 481           | 44                               | 4      | 2                      | 0                                 | G to A            |
| Os11g32240-2 | 1,399 | 604           | 176                              | 3      | 1                      | 1                                 | G to A            |
| Os11g32240-3 | 1,731 | 896           | 233                              | 0      | 0                      | 0                                 | G to A            |

(To be continued)

**Supplementary Table 7. Number of candidate mutations remaining after each filtering step in Pool B (continued)**

| Fragments    | Raw     | MiSD<br>(512) | MiMF<br>(3.02x10 <sup>-3</sup> ) | 1X1Y1Z | Candidate<br>mutations | <i>t</i> -test of<br>significance | Mutation<br>types |
|--------------|---------|---------------|----------------------------------|--------|------------------------|-----------------------------------|-------------------|
| Os05g12040-1 | 1,541   | 1,115         | 274                              | 3      | 1                      | 1                                 | G to A            |
| Os07g28110-1 | 1,028   | 663           | 55                               | 0      | 0                      | 0                                 | G to A            |
| Os07g28110-2 | 2,438   | 1,400         | 392                              | 0      | 0                      | 0                                 | G to A            |
| Os07g28110-3 | 2,432   | 1,376         | 371                              | 0      | 0                      | 0                                 | G to A            |
| Os02g21810-1 | 2,276   | 381           | 60                               | 0      | 0                      | 0                                 | G to A            |
| Os02g21810-2 | 2,331   | 1,469         | 448                              | 0      | 0                      | 0                                 | G to A            |
| Os02g02230-1 | 1,992   | 941           | 195                              | 4      | 2                      | 0                                 | G to A            |
| Os02g02230-2 | 2,140   | 877           | 93                               | 3      | 1                      | 1                                 | G to A            |
| Os02g02230-3 | 1,894   | 872           | 203                              | 0      | 0                      | 0                                 | G to A            |
| Os05g34325-1 | 2,674   | 1,488         | 543                              | 3      | 1                      | 0                                 | G to A            |
| Os05g34325-2 | 2,470   | 1,437         | 534                              | 3      | 1                      | 0                                 | G to A            |
| Os05g34325-3 | 2,241   | 1,121         | 282                              | 4      | 2                      | 0                                 | G to A            |
| Os05g34330-1 | 1,370   | 484           | 58                               | 3      | 1                      | 0                                 | G to A            |
| Os05g34330-2 | 2,150   | 1,105         | 74                               | 0      | 0                      | 0                                 | G to A            |
| Os05g34330-3 | 1,893   | 1,034         | 248                              | 0      | 0                      | 0                                 | G to A            |
| Os05g34380-1 | 1,222   | 121           | 13                               | 0      | 0                      | 0                                 | G to A            |
| Os05g34380-2 | 1,489   | 897           | 133                              | 0      | 0                      | 0                                 | G to A            |
| Os05g34380-3 | 1,258   | 480           | 90                               | 0      | 0                      | 0                                 | G to A            |
| Os07g37970-1 | 1,208   | 576           | 86                               | 0      | 0                      | 0                                 | G to A            |
| Os07g37970-2 | 1,708   | 1,108         | 284                              | 0      | 0                      | 0                                 | G to A            |
| Os11g18194-1 | 1,566   | 1,202         | 326                              | 4      | 2                      | 0                                 | G to A            |
| Os11g18194-2 | 1,215   | 471           | 74                               | 0      | 0                      | 0                                 | G to A            |
| Os11g18194-3 | 1,238   | 335           | 8                                | 0      | 0                      | 0                                 | G to A            |
| Os11g18194-4 | 1,407   | 872           | 230                              | 0      | 0                      | 0                                 | G to A            |
| Os11g18194-5 | 1,251   | 609           | 125                              | 0      | 0                      | 0                                 | G to A            |
| Os11g18366-1 | 2,046   | 1,441         | 544                              | 4      | 2                      | 0                                 | G to A            |
| Os11g18366-2 | 1,506   | 286           | 69                               | 0      | 0                      | 0                                 | G to A            |
| Os11g18366-3 | 1,164   | 562           | 82                               | 3      | 1                      | 1                                 | G to A            |
| Os06g28820-1 | 1,900   | 834           | 98                               | 0      | 0                      | 0                                 | G to A            |
| Os06g28820-2 | 1,484   | 974           | 366                              | 0      | 0                      | 0                                 | G to A            |
| Os06g28820-3 | 1,459   | 423           | 41                               | 3      | 1                      | 1                                 | G to A            |
| Os06g28820-4 | 1,285   | 872           | 219                              | 4      | 2                      | 0                                 | G to A            |
| Os06g28820-5 | 1,380   | 757           | 247                              | 0      | 0                      | 0                                 | G to A            |
| Sum          | 120,109 | 62,154        | 7,497                            | 72     | 28                     | 11                                |                   |

**Supplementary Table 8. The confirmed genuine and false positive mutations by Sanger sequencing**

| Candidate mutations | Fragments     | Positions | Types  | Coordinates in 3D pool | TRUE or FALSE* | Pool |
|---------------------|---------------|-----------|--------|------------------------|----------------|------|
| No.1                | Os11g32240-F3 | 3,458     | C to T | X3Y6Z6                 | TRUE           | A    |
| No.2                | Os02g02230-F3 | 2,367     | C to T | X8Y5Z1                 | TRUE           | A    |
| No.3                | Os05g34325-F3 | 2,342     | C to T | X5Y3Z4                 | TRUE           | A    |
| No.4                | Os05g34330-F3 | 5,417     | C to T | X6Y7Z5                 | TRUE           | A    |
| No.5                | Os06g28820-F1 | 279       | G to A | X8Y8Z2                 | TRUE           | A    |
| No.6                | Os07g28110-F2 | 1,209     | G to A | X2Y6Z2                 | FALSE          | A    |
| No.7                | Os02g02230-F1 | 277       | G to A | X6Y1Z1                 | FALSE          | A    |
| No.8                | Os02g02230-F1 | 277       | G to A | X6Y1Z3                 | FALSE          | A    |
| No.9                | Os05g34325-F2 | 1,498     | G to A | X3Y3Z3                 | FALSE          | A    |
| No.10               | Os05g34325-F2 | 1,498     | G to A | X2Y3Z3                 | FALSE          | A    |
| No.11               | Os11g32240-F3 | 3,449     | C to T | X5Y4Z2                 | TRUE           | B    |
| No.12               | Os11g32240-F3 | 3,498     | C to T | X5Y5Z7                 | TRUE           | B    |
| No.13               | Os05g12040-F1 | 1,094     | C to T | X8Y6Z7                 | TRUE           | B    |
| No.14               | Os02g02230-F1 | 230       | C to T | X7Y1Z5                 | TRUE           | B    |
| No.15               | Os05g34380-F2 | 1,017     | C to T | X8Y6Z6                 | TRUE           | B    |
| No.16               | Os06g28820-F2 | 8,307     | C to T | X4Y6Z1                 | TRUE           | B    |
| No.17               | Os11g32240-F2 | 3,026     | G to A | X5Y8Z2                 | TRUE           | B    |
| No.18               | Os05g12040-F1 | 1,018     | G to A | X7Y8Z2                 | TRUE           | B    |
| No.19               | Os02g02230-F2 | 1,808     | G to A | X7Y7Z1                 | TRUE           | B    |
| No.20               | Os11g18366-F3 | 12,453    | G to A | X7Y5Z3                 | TRUE           | B    |
| No.21               | Os06g28820-F3 | 8,768     | G to A | X2Y4Z2                 | TRUE           | B    |
| No.22               | Os07g28110-F3 | 1,634     | C to T | X5Y2Z1                 | FALSE          | B    |
| No.23               | Os02g02230-F1 | 279       | G to A | X1Y3Z2                 | FALSE          | B    |
| No.24               | Os02g02230-F1 | 279       | G to A | X1Y3Z7                 | FALSE          | B    |
| No.25               | Os05g34325-F1 | 745       | G to A | X2Y2Z3                 | FALSE          | B    |
| No.26               | Os05g34325-F2 | 1,564     | G to A | X1Y6Z6                 | FALSE          | B    |
| No.27               | Os11g18366-F1 | 276       | G to A | X5Y2Z5                 | FALSE          | B    |
| No.28               | Os11g18366-F1 | 276       | G to A | X7Y2Z5                 | FALSE          | B    |

\* TRUE indicates the genuine mutation. FALSE indicates the false positive mutation.

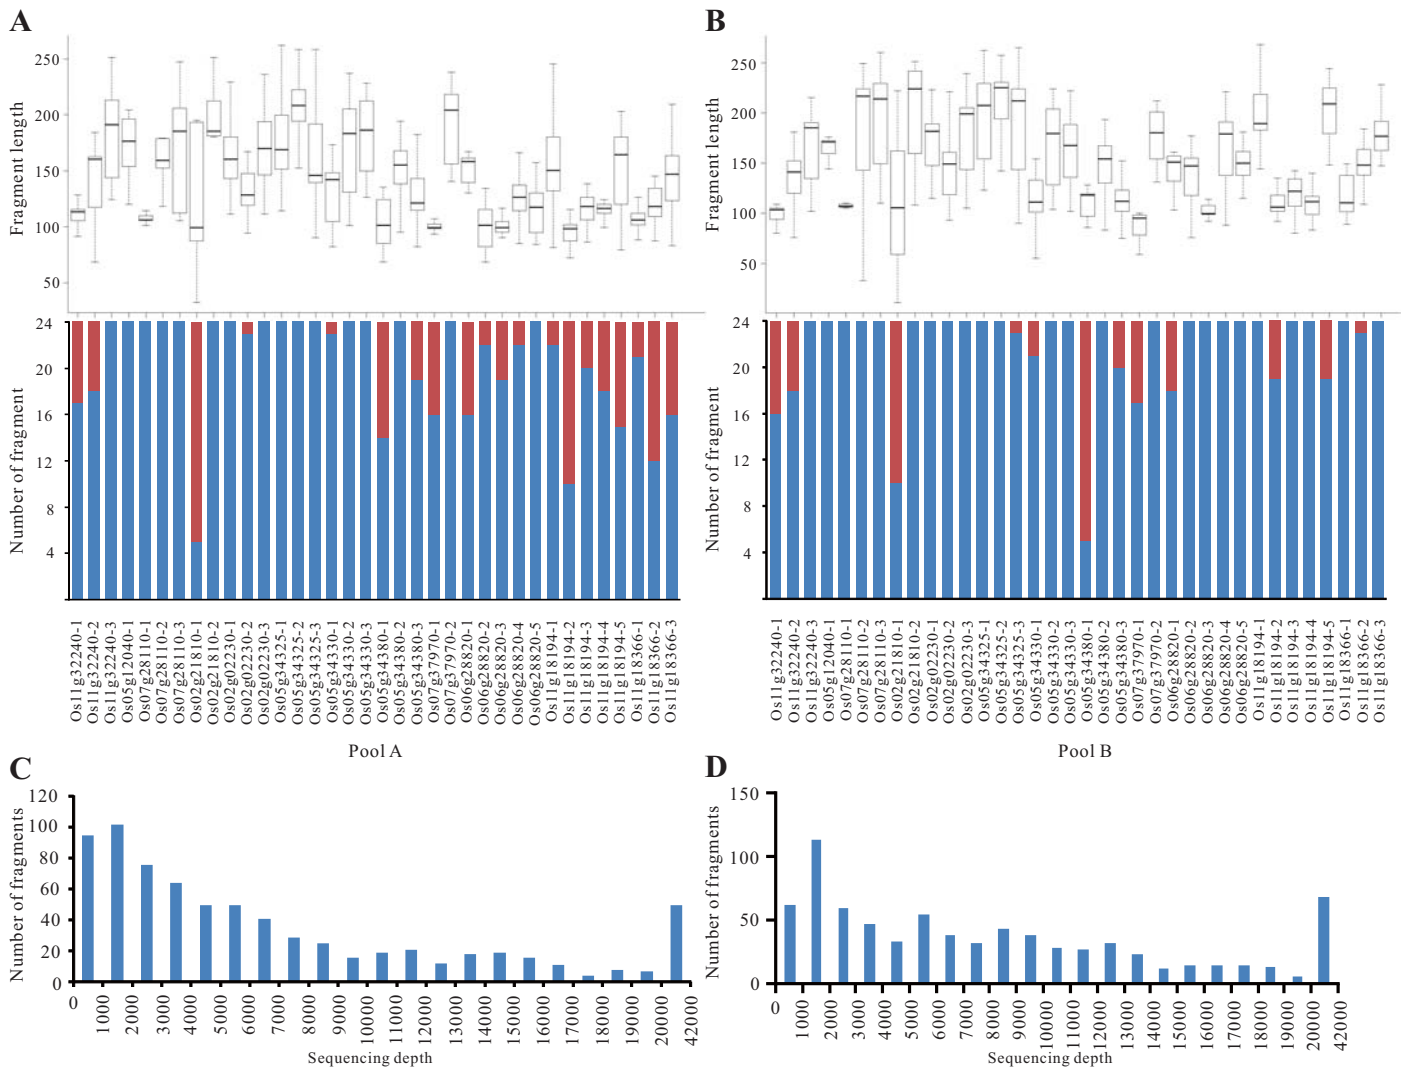

Supplementary Fig. 1. Summary of the enriched products in Pools A and B. (a & b) The fragment length of each enriched target fragment (shown by the box plot) and the number of successfully enriched (blue) or non-enriched (red) fragments (shown in the histogram). (c & d) The distribution of sequencing depth among the enriched fragments.
